# Supplementary material
Source: MDPI journal article supplement (https://www.mdpi.com/2311-7524/9/2/220)
Supplement: s1 [file s1]

## Supplementary Materials:

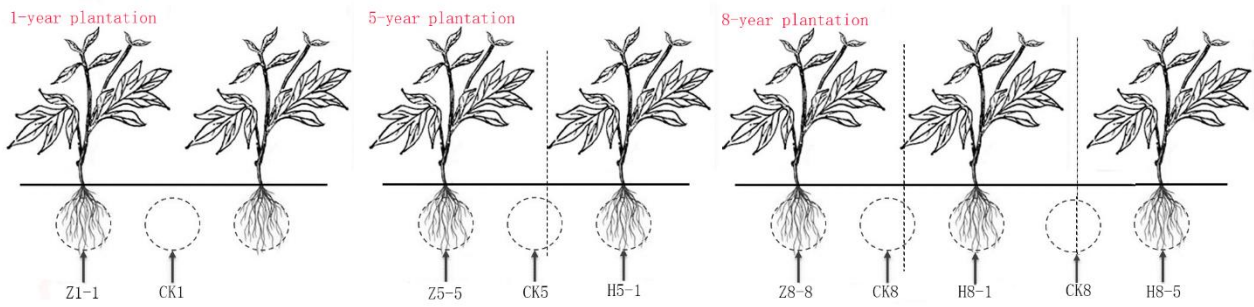

**Figure.S1** Soil sample. Note: The naming of each sample in the table is the same as that in Table 2.

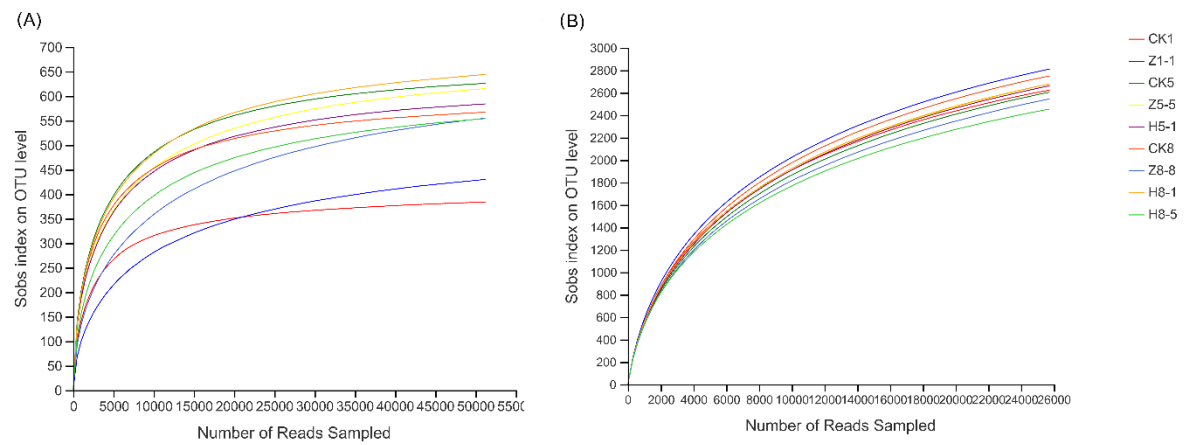

**Figure.S2** Rarefaction curves of OTUs in each soil sample. Note: The naming of each sample in the figure is the same as that in Table 2. (A): Rarefaction curves of OTUs of fungi; (B): Rarefaction curves of OTUs of bacteria.

**Table S1** Relative abundance of fungi communities in soil under different years of planting and replanting at the species level.

| Sample               |      | <i>Clitopilus</i><br>sp. | <i>Psathyrella</i><br><i>kellermanii</i> | <i>Cystobasidium</i><br><i>minuta</i> |
|----------------------|------|--------------------------|------------------------------------------|---------------------------------------|
| 1-year<br>plantation | CK1  | 0.00%                    | 0.00%                                    | 0.00%                                 |
|                      | Z1-1 | 0.00%                    | 0.00%                                    | 0.00%                                 |
| 5-year<br>plantation | CK5  | 0.00%                    | 0.00%                                    | 0.00%                                 |
|                      | Z5-5 | 0.00%                    | 0.00%                                    | 0.00%                                 |
|                      | H5-1 | 0.00%                    | 0.00%                                    | 0.00%                                 |
| 8-year<br>plantation | CK8  | 0.00%                    | 0.00%                                    | 0.00%                                 |
|                      | Z8-8 | 0.00%                    | 0.00%                                    | 0.00%                                 |
|                      | H8-1 | 0.01%                    | 0.04%                                    | 0.02%                                 |
|                      | H8-5 | 0.05%                    | 0.02%                                    | 0.01%                                 |

Note: The naming of each sample in the table is the same as that in Table 2.

**Table S2** Relative abundance of bacterial communities in soil under different years of planting and replanting at the species level.

| Sample               |      | <i>Azorhizobium</i><br><i>doebereinerae</i> | <i>Legionella</i><br><i>feeleii</i> | <i>Verrucomicrobiaceae</i><br><i>bacterium</i> | <i>Sphaerobacter</i><br><i>thermophiles</i><br>DSM_20745 |
|----------------------|------|---------------------------------------------|-------------------------------------|------------------------------------------------|----------------------------------------------------------|
| 1-year<br>plantation | CK1  | 0.00%                                       | 0.00%                               | 0.00%                                          | 0.00%                                                    |
|                      | Z1-1 | 0.00%                                       | 0.00%                               | 0.00%                                          | 0.00%                                                    |
| 5-year<br>plantation | CK5  | 0.00%                                       | 0.00%                               | 0.00%                                          | 0.00%                                                    |
|                      | Z5-5 | 0.00%                                       | 0.00%                               | 0.00%                                          | 0.00%                                                    |
|                      | H5-1 | 0.00%                                       | 0.00%                               | 0.00%                                          | 0.00%                                                    |
| 8-year<br>plantation | CK8  | 0.00%                                       | 0.00%                               | 0.00%                                          | 0.00%                                                    |
|                      | Z8-8 | 0.00%                                       | 0.00%                               | 0.00%                                          | 0.00%                                                    |
|                      | H8-1 | 0.00%                                       | 0.00%                               | 0.00%                                          | 0.00%                                                    |
|                      | H8-5 | 0.05%                                       | 0.04%                               | 0.03%                                          | 0.01%                                                    |

Note: The naming of each sample in the table is the same as that in Table 2.
